# Supplementary material
Source: PubMed Central journal article supplement (PMC3124922)
Supplement: ci200117n_si_001.pdf [file ci200117n_si_001.pdf]

## Supporting Information

# Predictive Power of Molecular Dynamics Receptor Structures in Virtual Screening

*Sara E. Nichols,<sup>1,2</sup> Riccardo Baron,<sup>1,2</sup> Anthony D. Ivetac,<sup>1,2</sup> J. Andrew McCammon<sup>1,2,3,4</sup>*

1. Department of Chemistry and Biochemistry,

2. Department of Pharmacology,

3. Center for Theoretical Biological Physics,

4. Howard Hughes Medical Institute,

University of California San Diego, La Jolla, CA 92093-0365, USA.

## SUPPORTING TABLES

**Table SI Structures Used in Study**

| <i>System</i>             | <i>Structure</i>                                                                                                                                                                                                                                                                                     |
|---------------------------|------------------------------------------------------------------------------------------------------------------------------------------------------------------------------------------------------------------------------------------------------------------------------------------------------|
| RT X-rays:                | 1BQM, 1DLO, 1EP4, 1FK9, 1HMV, 1HVN, 1KLM, 1RT1,1RT4, 1RTD, 1VRT, 1VRU, 2HMI, 2ZD1, 3DLK                                                                                                                                                                                                              |
| RT Binders:               | Rilpivirine/TMC-278, Etravirine/TMC-125, DPC-083, Efavirenz, MKC-442, RDEA-806, S-1153, 8-Cl TBO, HEPT, UC-781, GW678248, MIV-150, Troviridine/PETT, UK-453061, MK-4965, S-DABO-3W, Loviride/Alpha-APA, Nevirapine, HBY-097, Delavirdine                                                             |
| RT Decoys:                | National Cancer Institute Diversity Set II ( <a href="http://dtp.cancer.gov">http://dtp.cancer.gov</a> )                                                                                                                                                                                             |
| W191G X-rays:             | 1AA4, 1AC4, 1AC8, 1AEB, 1AED, 1AEE, 1AEF, 1AEG, 1AEH, 1AEJ, 1AEK, 1AEM, 1AEN, 1AEO, 1AEQ, 1AES, 1AET, 1AEU, 1AEV, 1BEJ, 1CMP, 1CMQ, 1CMT, 1RYC, 2ANZ, 2AQD, 2AS1, 2AS2, 2AS3, 2AS4, 2AS6, 2EUN, 2EUO, 2EUP, 2EUQ, 2EUR, 2EUS, 2EUT, 2EUU, 2RBT, 2RBU, 2RBV, 2RBW, 2RBX, 2RBY, 2RBZ, 2RC0, 2RC1, 2RC2 |
| W191G Binders and Decoys: | Shoichet Lab at UCSF provided the list of binders/non-binders. ( <a href="http://shoichetlab.compbio.ucsf.edu/take-away.php">http://shoichetlab.compbio.ucsf.edu/take-away.php</a> )                                                                                                                 |

**Table SII Predictive Power of MD Structures Compared to X-ray models and Random Ranking**

| <b>Receptor</b> | <b>System</b>       | <b>Nr. MD Structures with Higher Predictive Power than Mean X-ray model</b> |          | <b>Nr. MD Structures with Higher Predictive Power than Random Ranking</b> |          |
|-----------------|---------------------|-----------------------------------------------------------------------------|----------|---------------------------------------------------------------------------|----------|
|                 |                     |                                                                             | <b>%</b> |                                                                           | <b>%</b> |
| RT              | $\alpha$ -APA bound | 788                                                                         | 31.5     | 2496                                                                      | 99.8     |
|                 | UC-781 bound        | 566                                                                         | 22.6     | 2497                                                                      | 99.9     |
|                 | unbound open        | 1239                                                                        | 49.6     | 632                                                                       | 25.3     |
|                 | unbound closed      | 1288                                                                        | 51.5     | 523                                                                       | 20.9     |
| W191G           | 2a5mt bound         | 298                                                                         | 12.0     | 2350                                                                      | 94.0     |

|  |                |    |     |      |      |
|--|----------------|----|-----|------|------|
|  | unbound open   | 20 | 0.8 | 1790 | 71.6 |
|  | unbound closed | 4  | 0.2 | 2206 | 88.2 |

**Table SIII Mean Fluctuations of the Binding Site With Respect to Mean AUC Values**

| <b>Receptor</b> | <b>System</b>  | <b>&lt;AUC&gt;</b> | <b>All-atom &lt;RMSF&gt;</b><br><b>[Å]</b> | <b>C<sup>α</sup>-atom &lt;RMSF&gt;</b><br><b>[Å]</b> |
|-----------------|----------------|--------------------|--------------------------------------------|------------------------------------------------------|
| RT              | α-APA bound    | 0.77               | 0.91                                       | 0.73                                                 |
|                 | UC-781 bound   | 0.75               | 0.84                                       | 0.65                                                 |
|                 | unbound open   | 0.44               | 1.22                                       | 1.05                                                 |
|                 | unbound closed | 0.44               | 1.34                                       | 1.19                                                 |
| W191G           | 2a5mt bound    | 0.66               | 0.93                                       | 0.54                                                 |
|                 | unbound open   | 0.58               | 1.38                                       | 0.91                                                 |
|                 | unbound closed | 0.59               | 1.22                                       | 0.81                                                 |

## SUPPORTING FIGURES

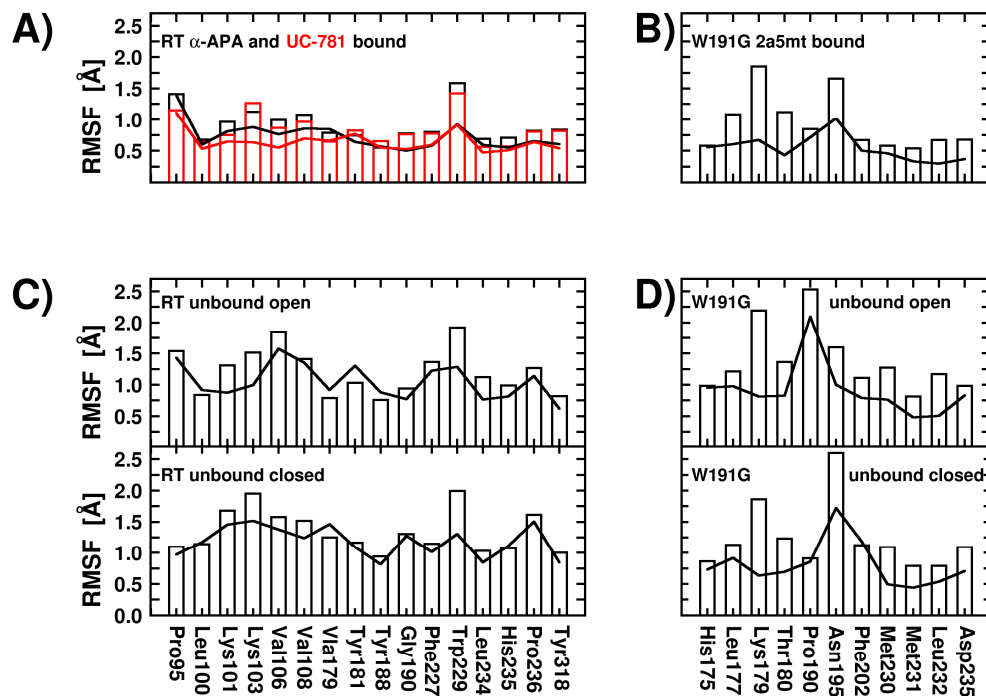

Figure S1. Root-mean-square fluctuations (RMSF) of binding site residues from molecular dynamics simulations of RT (left), and W191G (right). A) and B) show ligand-bound simulation fluctuations, C) and D) show unbound simulation fluctuations. Bars indicate the backbone C $\alpha$ -atom positions RMSF values. Lines indicate all atom RMSF values. In all cases, RMSF values were calculated using sampling of 50 ns.
